# Supplementary material
Source: MDPI journal article supplement (https://www.mdpi.com/2073-4395/12/2/467)
Supplement: s1 [file s1 › agronomy-1557921-supplementary.pdf]

## Supplementary Materials

**Supplementary Table S1.** List of treatments during the pilot experiment.

| # | Treatments                                                                                                                                                                                                                                              |
|---|---------------------------------------------------------------------------------------------------------------------------------------------------------------------------------------------------------------------------------------------------------|
| 1 | Covering mushroom compost with untreated casing material                                                                                                                                                                                                |
| 2 | Covering mushroom compost with sterilized casing material                                                                                                                                                                                               |
| 3 | Inoculating mushroom compost with <i>T. aggressivum</i> conidia ( $10^6$ g <sup>-1</sup> of compost), covering with untreated casing material                                                                                                           |
| 4 | Covering mushroom compost with untreated casing material, followed by inoculation with <i>T. aggressivum</i> conidia ( $10^6$ g <sup>-1</sup> of casing material)                                                                                       |
| 5 | Covering mushroom compost with sterilized casing material, followed by inoculation with <i>T. aggressivum</i> conidia ( $10^6$ g <sup>-1</sup> of casing material)                                                                                      |
| 6 | Inoculating mushroom compost with <i>T. aggressivum</i> conidia ( $10^6$ g <sup>-1</sup> of compost), covering with sterilized casing material, followed by inoculation with <i>T. aggressivum</i> conidia ( $10^6$ g <sup>-1</sup> of casing material) |

**Supplementary Table S2.** Bacterial strains isolated and identified during the study.

| SZMC Number | Strain                          | Locus Used for Identification | GenBank Accession Number | Similarity to Reference Strain (%) | GenBank Accession Number of Reference Strain |
|-------------|---------------------------------|-------------------------------|--------------------------|------------------------------------|----------------------------------------------|
| 25287       | <i>B. licheniformis</i>         | 16S                           | OM320465                 | 98.02                              | NZ_CP034569.1                                |
| 25290       | <i>B. pumilus</i>               | 16S                           | OM320466                 | 99.59                              | NZ_LT906438.1                                |
| 25295       | <i>B. simplex</i>               | 16S                           | OM320467                 | 100                                | NZ_CP017704.1                                |
| 25368       | <i>Bacillus</i> sp.             | -                             | -                        |                                    |                                              |
| 25370       | <i>Bacillus</i> sp.             | -                             | -                        |                                    |                                              |
| 25371       | <i>Bacillus</i> sp.             | -                             | -                        |                                    |                                              |
| 25372       | <i>Bacillus</i> sp.             | -                             | -                        |                                    |                                              |
| 25428       | <i>Bacillus</i> sp.             | -                             | -                        |                                    |                                              |
| 25429       | <i>B. licheniformis</i>         | 16S                           | OM320468                 | 97.86                              | NZ_CP034569.1                                |
| 25430       | <i>Bacillus</i> sp.             | -                             | -                        |                                    |                                              |
| 25431       | <i>B. velezensis</i>            | 16S                           | OM320469                 | 100                                | CP087137.1                                   |
|             |                                 | <i>gyrA</i>                   | OM326895                 | 100                                | CP081488.1                                   |
|             |                                 | <i>rpoB</i>                   | OM469331                 | 99.72                              | CP081488.1                                   |
| 25434       | <i>Bacillus</i> sp.             | -                             | -                        |                                    |                                              |
| 25439       | <i>Bacillus</i> sp.             | -                             | -                        |                                    |                                              |
| 25441       | <i>Bacillus</i> sp.             | -                             | -                        |                                    |                                              |
| 25442       | <i>B. velezensis</i>            | 16S                           | OM320470                 | 100                                | JN700139.1                                   |
| 25443       | <i>Bacillus</i> sp.             | -                             | -                        |                                    |                                              |
| 25444       | <i>Bacillus</i> sp.             | -                             | -                        |                                    |                                              |
| 25446       | <i>Bacillus</i> sp.             | -                             | -                        |                                    |                                              |
| 25447       | <i>Bacillus</i> sp.             | -                             | -                        |                                    |                                              |
| 25449       | <i>B. subtilis</i>              | 16S                           | OM320471                 | 100                                | NC_000964.3                                  |
| 25450       | <i>Bacillus</i> sp.             | -                             | -                        |                                    |                                              |
| 25451       | <i>B. licheniformis</i>         | 16S                           | OM320472                 | 99.43                              | NZ_CP034569.1                                |
| 25456       | <i>Brevibacillus panacihumi</i> | 16S                           | OM320473                 | 100                                | EU383032.1                                   |
| 25459       | <i>Brevibacillus panacihumi</i> | 16S                           | OM320474                 | 99.59                              | EU383032.1                                   |
| 25460       | <i>B. licheniformis</i>         | 16S                           | OM320475                 | 99.59                              | NZ_CP034569.1                                |
| 25462       | <i>B. licheniformis</i>         | 16S                           | OM320476                 | 99.59                              | NZ_CP034569.1                                |
| 25463       | <i>B. licheniformis</i>         | 16S                           | OM320477                 | 99.40                              | NZ_CP034569.1                                |

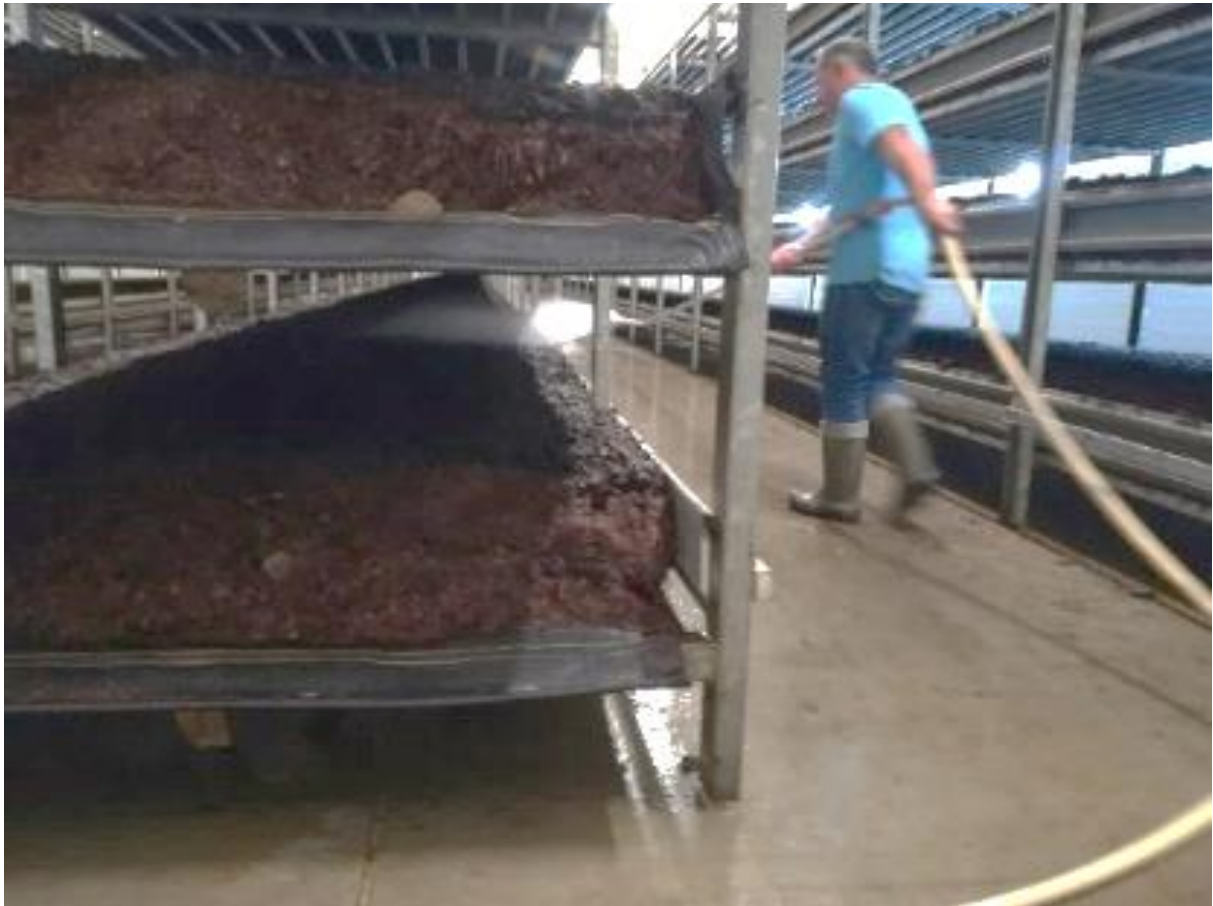

**Supplementary Figure S1.** Application of the *Bacillus velezensis* suspension in the mushroom growing house using water tanks.

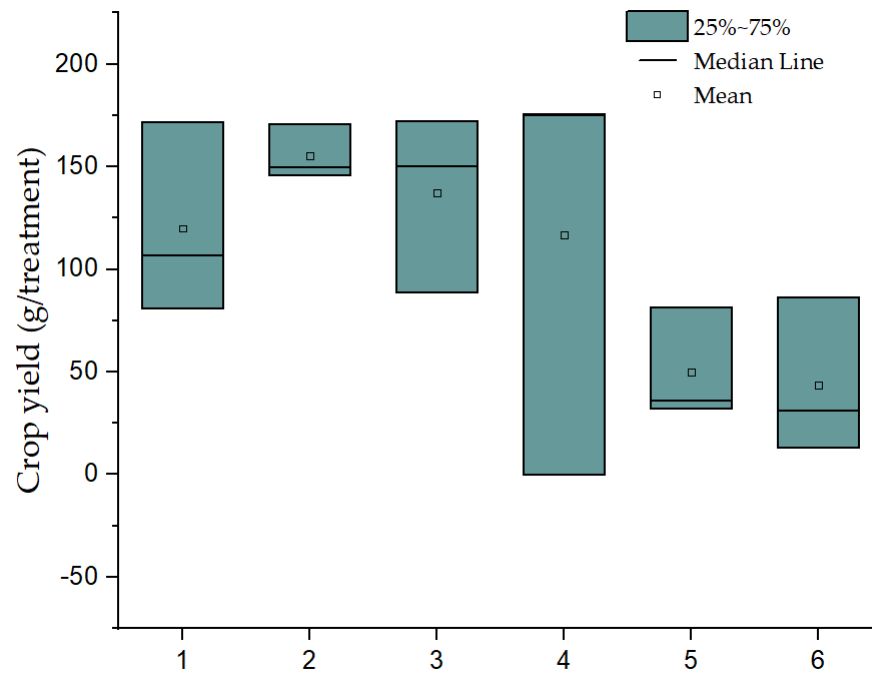

**Supplementary Figure S2.** Effect of artificial *Trichoderma aggressivum* infection on the crop yield of *Agaricus bisporus* grown in pots in a plant growth chamber. Standard deviations were calculated considering the first, second and third flush. 25% and 75% values are represented by boxes, mean values are represented by squares, median value as a line. Numbers 1-6 on the x axis indicate the treatments described in Supplementary Table S1.
